# Supplementary material
Source: PubMed Central journal article supplement (PMC7735700)
Supplement: ct0c00483_si_001.pdf [file ct0c00483_si_001.pdf]

**Supporting Information: Dopamine-decorated TiO<sub>2</sub> nanoparticles in water: a QM/MM vs an MM description**

Paulo Siani,<sup>1</sup> Stefano Motta,<sup>2</sup> Lorenzo Ferraro,<sup>1</sup> Asmus O. Dohn,<sup>3</sup> Cristiana Di Valentin<sup>1,\*</sup>

<sup>1</sup> Dipartimento di Scienza dei Materiali, Università di Milano Bicocca  
Via Cozzi 55, 20125 Milano Italy

<sup>2</sup> Dipartimento di Scienze dell'Ambiente e della Terra, Università di Milano Bicocca  
Piazza della Scienza 1, 20125 Milano Italy

<sup>3</sup> Faculty of Physical Sciences and Science Institute, University of Iceland, 107 Reykjavík, Iceland &  
Department of Physics, Technical University of Denmark, DK-2800 Lyngby, Denmark

---

\* Corresponding author: [cristiana.divalentin@unimib.it](mailto:cristiana.divalentin@unimib.it)

**Table S1.** Partial atomic charges on the atoms of a dissociated dopamine on the NP from HF, DFT, and SCC-DFTB calculations. (Atomic charge is in unit  $e$ ).

| Atom-type | HF <sup>†</sup> | DFT <sup>‡</sup> | DFTB <sup>‡</sup> |
|-----------|-----------------|------------------|-------------------|
| O1        | -0.56010        | -0.65105         | -0.36635          |
| O2        | -0.55408        | -0.64807         | -0.39316          |
| C1        | 0.33646         | 0.13254          | 0.21764           |
| C2        | 0.32326         | 0.13956          | 0.20965           |
| C3        | -0.37992        | -0.18323         | -0.19040          |
| C4        | -0.15126        | -0.13775         | -0.14715          |
| C5        | -0.00648        | -0.21999         | 0.00822           |
| C6        | -0.43803        | -0.09793         | -0.22691          |
| H1        | 0.17834         | 0.20243          | 0.08405           |
| H2        | 0.14569         | 0.18076          | 0.07888           |
| H3        | 0.19300         | 0.19984          | 0.08882           |
| C7        | -0.03289        | -0.30852         | -0.13215          |
| H4        | 0.04809         | 0.16501          | 0.06637           |
| H5        | 0.04809         | 0.17049          | 0.06938           |
| C8        | 0.40929         | -0.04451         | 0.01760           |
| H6        | -0.03388        | 0.14601          | 0.04013           |
| H7        | -0.03388        | 0.13469          | 0.03778           |
| N1        | -1.04833        | -0.65865         | -0.46571          |
| H8        | 0.36938         | 0.22590          | 0.19267           |
| H9        | 0.36938         | 0.22843          | 0.19226           |
| H10       | 0.41012         | 0.49056*         | 0.33423*          |
| H11       | 0.40777         | 0.48158*         | 0.33373*          |

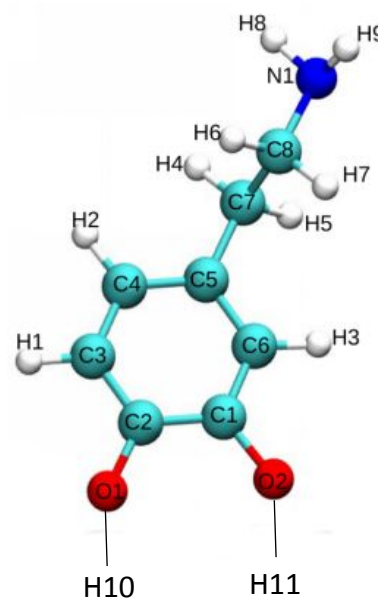

<sup>†</sup> single-dopamine molecule in vacuum

<sup>‡</sup> partial atomic charges averaged over all dopamine molecules on the nanoparticle.

\* undissociated hydrogen atoms bonded to the O1 and O2 atoms, respectively.

**Table S2.** Comparison of binding energy (in eV) of a single molecular water at three Ti sites on the bare anatase TiO<sub>2</sub> NP surface calculated at the DFT, DFTB, QM(DFTB)/MM and MM level of theory with the original Matsui-Akaogi (MA) or reparametrized Matsui-Akaogi (OPT) force fields. For the Ti sites numbering and for DFT and DFTB data see Ref.: Fazio, G. et al. *ACS Appl. Mater. Interfaces* **2018**, *10*, 29943–29953.

| Method/Ti site      | Ti <sub>5c</sub> (4) | Ti <sub>5c</sub> (5) | Ti <sub>5c</sub> (14) |
|---------------------|----------------------|----------------------|-----------------------|
| <b>DFT</b>          | -0.92                | -0.55                | -1.57                 |
| <b>DFTB</b>         | -1.00                | -0.41                | -1.17                 |
| <b>QM(DFTB)/MA</b>  | -0.61                | -0.49                | -0.66                 |
| <b>QM(DFTB)/OPT</b> | -0.36                | -0.43                | -0.40                 |
| <b>MA</b>           | -1.10                | -1.33                | -1.21                 |
| <b>OPT</b>          | -1.64                | -1.27                | -1.27                 |

**Table S3.** Comparison of Ti-O<sub>w</sub> distance (in Å) of a single molecular water at three Ti sites on the bare anatase TiO<sub>2</sub> NP surface calculated at the DFT, DFTB, QM(DFTB)/MM and MM level of theory with the original Matsui-Akaogi (MA) or reparametrized Matsui-Akaogi (OPT) force fields. For the Ti sites numbering and for DFT and DFTB data see Ref.: Fazio, G. et al. *ACS Appl. Mater. Interfaces* **2018**, *10*, 29943–29953.

| Method/Ti site      | Ti <sub>5c</sub> (4) | Ti <sub>5c</sub> (5) | Ti <sub>5c</sub> (14) |
|---------------------|----------------------|----------------------|-----------------------|
| <b>DFT</b>          | 2.22                 | 2.30                 | 2.10                  |
| <b>DFTB</b>         | 2.28                 | 2.29                 | 2.27                  |
| <b>QM(DFTB)/MA</b>  | 2.52                 | <i>3.10**</i>        | 2.56*                 |
| <b>QM(DFTB)/OPT</b> | <i>3.73*</i>         | <i>3.77**</i>        | <i>3.74*</i>          |
| <b>MA</b>           | 2.36                 | 2.50*                | 2.46*                 |
| <b>OPT</b>          | <i>5.99**</i>        | <i>3.70**</i>        | <i>3.75*</i>          |

Numbers in italic indicate that there is no Ti—O<sub>w</sub> bond but only H-bond interaction.

\*single H-bond with the exposed Oxygen atoms nearby the Ti site.

\*\*two H-bonds with the exposed Oxygen atoms nearby the Ti site.

**Table S4.** Comparison of tilt angle ( $\theta$ , degrees) between surface-bonded dopamine ligands with the NP surface in vacuum (T=300K). Experimental Carbon K-edge X-ray absorption fine structure (NEXAFS) and high-level DFTB predictions are compared with *in silico* low-level MM-MD predictions with the original Matsui-Akaogi (MA) or reparametrized Matsui-Akaogi (OPT) force fields with the HF point-charge model. Percentage of dopamine ligands for each state are shown in parenthesis. Open-state corresponds to dopamine ligands with  $\theta < 20^\circ$ . Intermediate means dopamine ligands within the range of  $20^\circ < \theta < 45^\circ$ . Closed-state refers to dopamine ligands with  $\theta > 45^\circ$ . Experimental tilt angle value from Ref.: Syres, K. et al. *Langmuir* **2010**, *26*, 14548–14555.

| Method/<tilt angle> | open-state | intermediate | closed-state | overall |
|---------------------|------------|--------------|--------------|---------|
| <b>Experimental</b> | 5°         | -            | -            | -       |
| <b>DFTB</b>         | 12° (46%)  | 32° (27%)    | 56° (27%)    | 29      |
| <b>b-OPT</b>        | 12° (55%)  | 31° (40%)    | 45° (5%)     | 21      |
| <b>MA</b>           | 11° (7%)   | 37° (20%)    | 68° (73%)    | 58      |

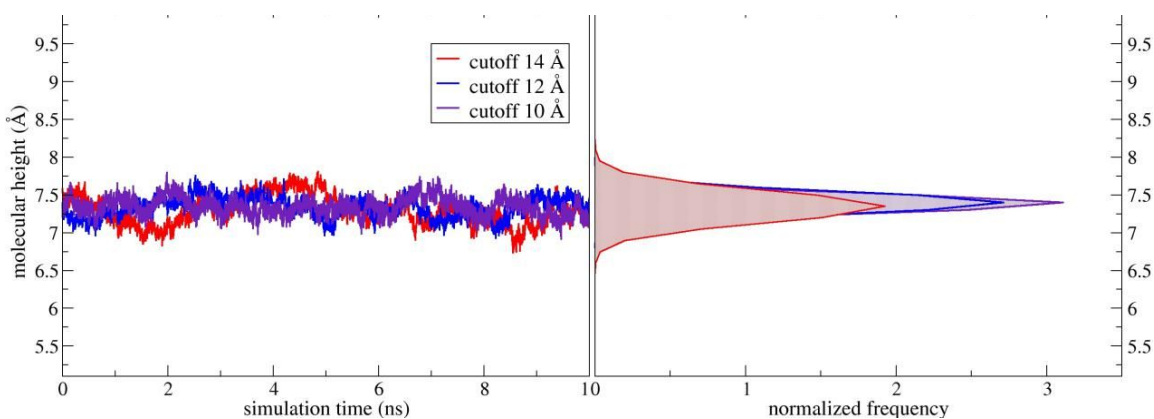

**Figure S1.** Effect of increasing nonbonded cutoff on the molecular height of bonded-dopamine on the NP surface. Three different nonbonded cutoffs were tested (10 Å, 12 Å, and 14 Å) in the MM-MD simulations. Increasing of the non-bonded cutoff broader the distribution of molecular height of dopamine for larger values, although no significant changes has been found on their average values.

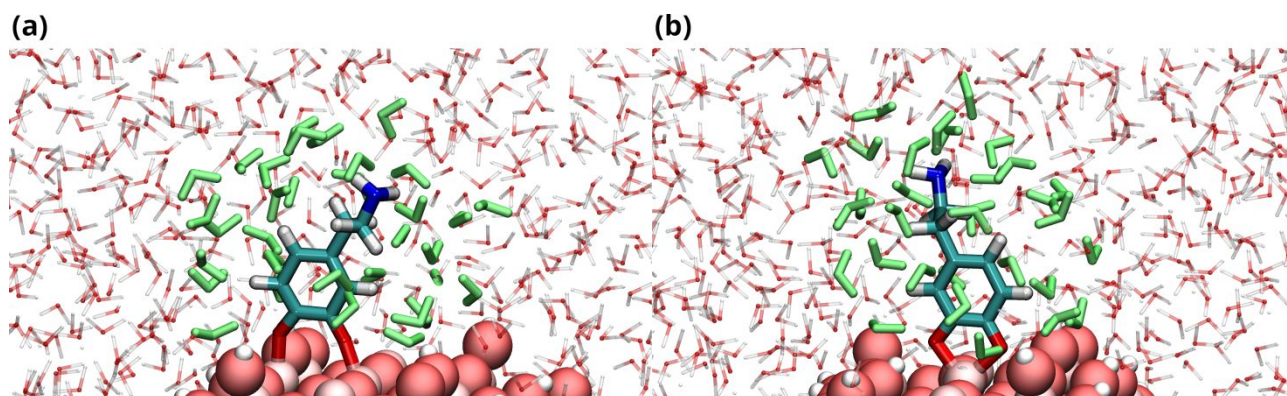

**Figure S2.** Final MD snapshots of molecular structures for a) bidentate and b) chelated binding modes of dopamine anchored to the TiO<sub>2</sub>-NP and immersed in bulk water. Atom colors are: Oxygen (red), Carbon (cyan), Hydrogen (white), and Titanium (pink). Solvating water molecules within a radius of 5 Å around the dopamine ligand are highlighted in green.

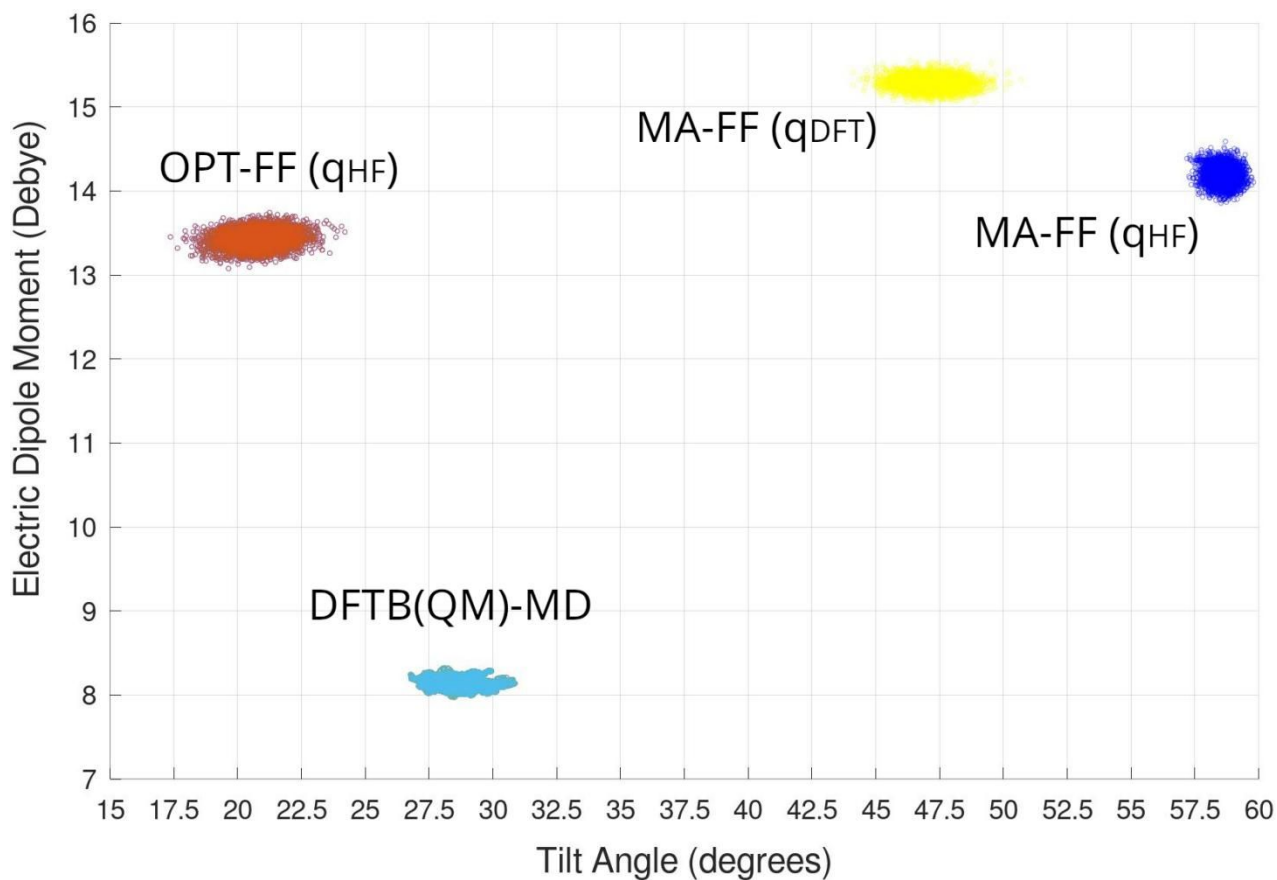

**Figure S3.** Average tilt angle versus dipole moment of dopamine ligands on the anatase TiO<sub>2</sub> NP surface estimated at QM(DFTB) and MM levels of theory in vacuum. At MM level, we tested OPT and MA force fields. Color coding: cyan (DFTB), brown (OPT, q<sub>HF</sub>), yellow (MA, q<sub>DFT</sub>) and blue (MA, q<sub>HF</sub>).
